# Supplementary material for: Boosting the electrochemical performance with functionalized dry electrodes for practical all-solid-state batteries
Source: Royal Society of Chemistry journal article supplement (doi:10.1039/d3ta05631g), 2023-12-28
Supplement: d3ta05631g1.pdf [file d3ta05631g1.pdf]

## Supporting Information

### **Boosting Electrochemical Performance with Functionalized Dry Electrode for Practical All-solid-state Batteries**

Dongsoo Lee<sup>a</sup> and Arumugam Manthiram<sup>a,\*</sup>

<sup>a</sup> Materials Science and Engineering Program & Texas Materials Institute, The University of Texas at Austin, Austin, TX, 78712-1591 USA

\*E-mail: [rmanth@mail.utexas.edu](mailto:rmanth@mail.utexas.edu)

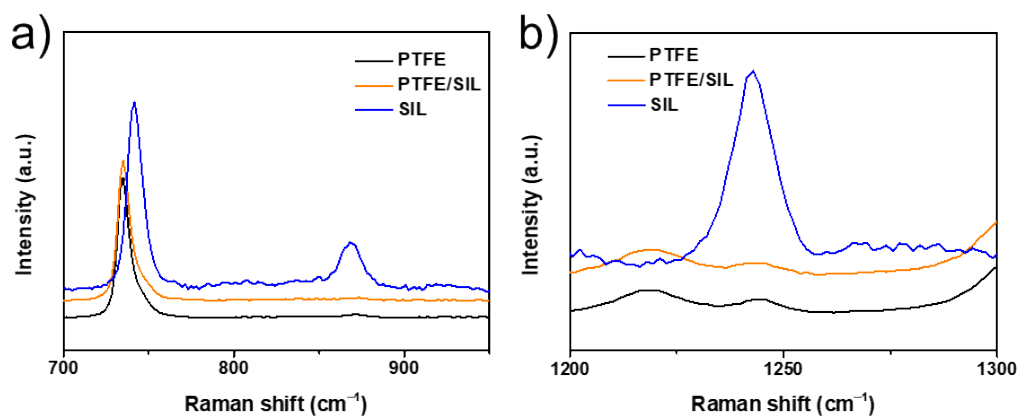

**Fig. S1** Raman Spectra of PTFE and SIL in the range of (a) 700 to 950  $\text{cm}^{-1}$  and (b) 1,200 to 1,300  $\text{cm}^{-1}$ .

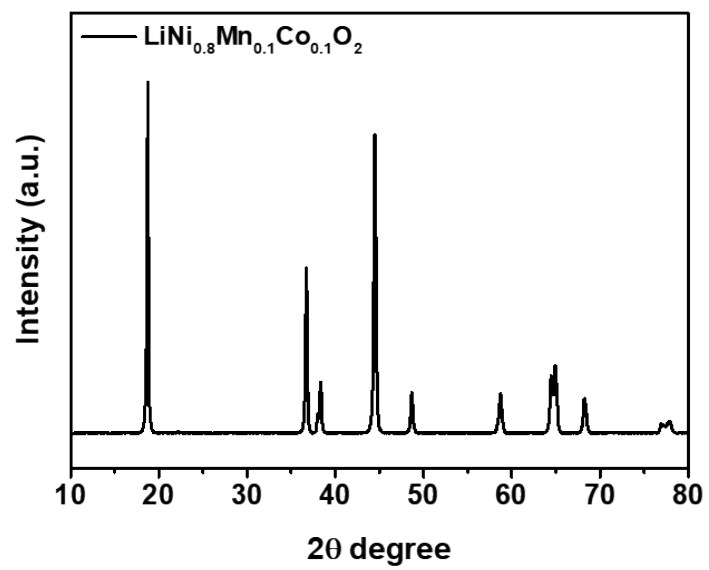

**Fig. S2** XRD patterns of  $\text{LiNi}_{0.8}\text{Mn}_{0.1}\text{Co}_{0.1}\text{O}_2$ .

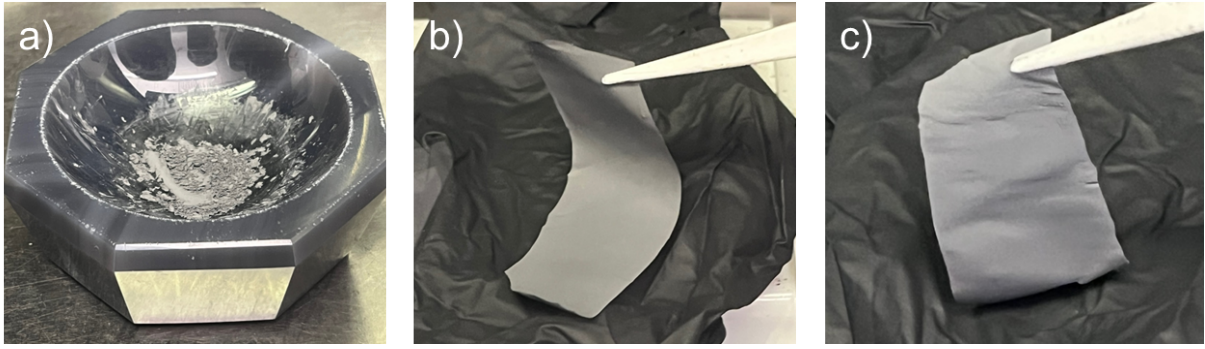

**Fig. S3** Digital photography of (a) dry mixing, (b) reference cathode, and (c) FDE.

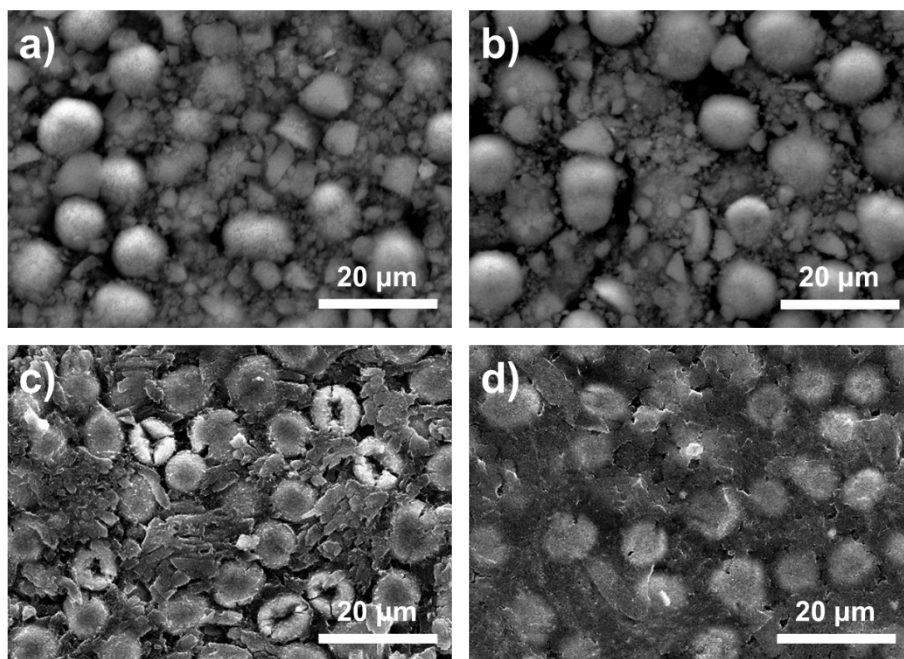

**Fig. S4** SEM images of the pristine electrodes before cycling for (a) reference and (b) FDE, and the electrodes after 200 cycles for (c) reference and (d) FDE.

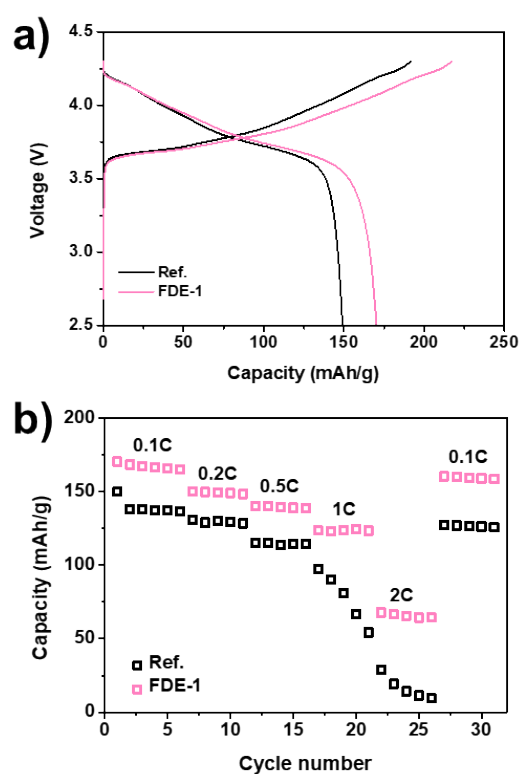

**Fig. S5** Electrochemical characterization of FDE-1 with a low SIL content. (a) Initial voltage profiles and (b) rate capability up to 2C rate of the reference cathode and the FDE-1. The FDE-1 was formulated with the weight ratio of NMC-811, LPSX, VGCF, PTFE, EC as 70 : 26 : 2 : 0.5 : 0.5 : 1.

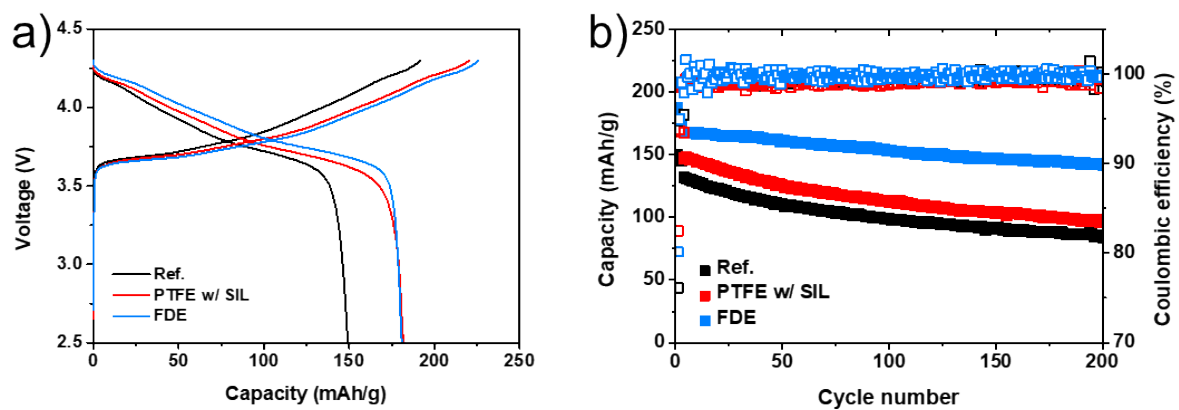

**Fig. S6** (a) Initial voltage profiles and (b) cycle performance of the reference cathode, the cathode with SIL, and FDE.
